# Supplementary material for: Enhancement in photocatalytic water splitting using van der Waals heterostructure materials based on penta-layers
Source: Royal Society of Chemistry journal article supplement (doi:10.1039/d2cp04866c), 2023-01-01
Supplement: d2cp04866c1.pdf [file d2cp04866c1.pdf]

# Enhancement in photocatalytic water splitting using van der Waals heterostructure materials based on penta-layers

M. Maymoun<sup>1\*</sup>, A. Elomrani<sup>1</sup>, S. Oukahou<sup>1</sup>, Y. Bahou<sup>1,2</sup>, A. Hasnaoui<sup>1</sup> and K. Sbiaai<sup>1</sup>

<sup>1</sup> LS2ME Laboratory, Sultan Moulay Slimane University of Beni Mellal, Polydisciplinary Faculty of Khouribga, B.P. 145, 25000 Khouribga, Morocco.

<sup>2</sup>Univ Hassan 1, Laboratoire Rayonnement-Matière et Instrumentation (RMI), FST Settat, KM 3 B.P. 577 route de Casablanca – 26000, Maroc.

\*Corresponding authors: E-mail addresses: maymoun17755@gmail.com (M. Maymoun)

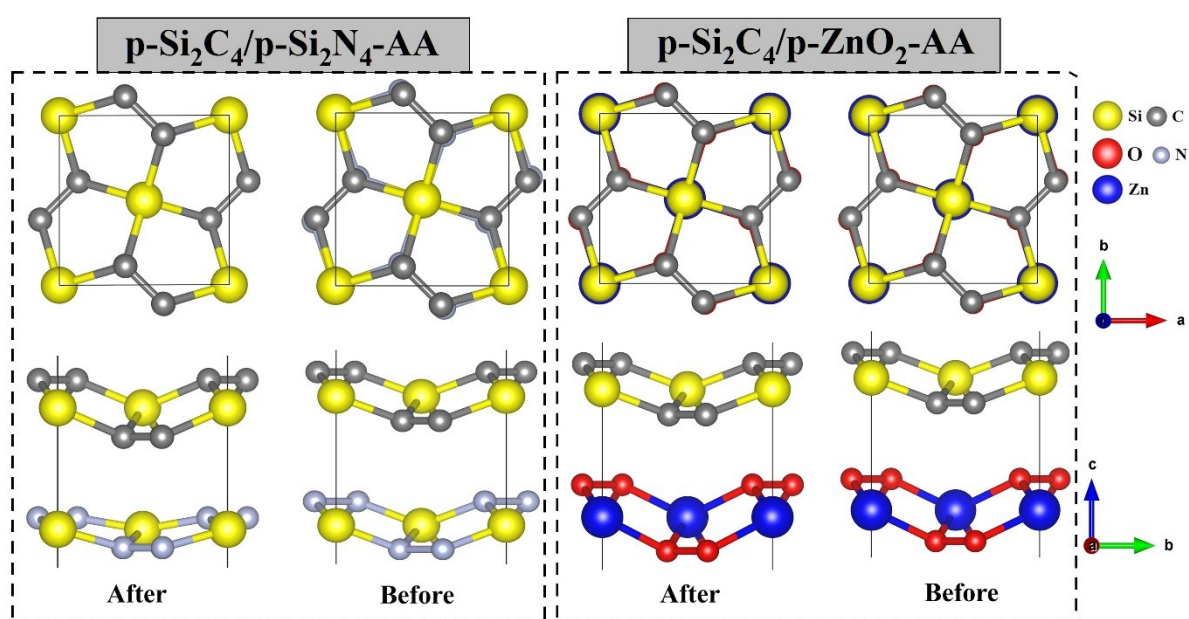

**Fig. S1.** Top and side views of (left) p-Si<sub>2</sub>C<sub>4</sub>/p-Si<sub>2</sub>N<sub>4</sub>, (right) p-Si<sub>2</sub>C<sub>4</sub>/p-ZnO<sub>2</sub> vdWHs with AA stacking mode after and before structural optimization.

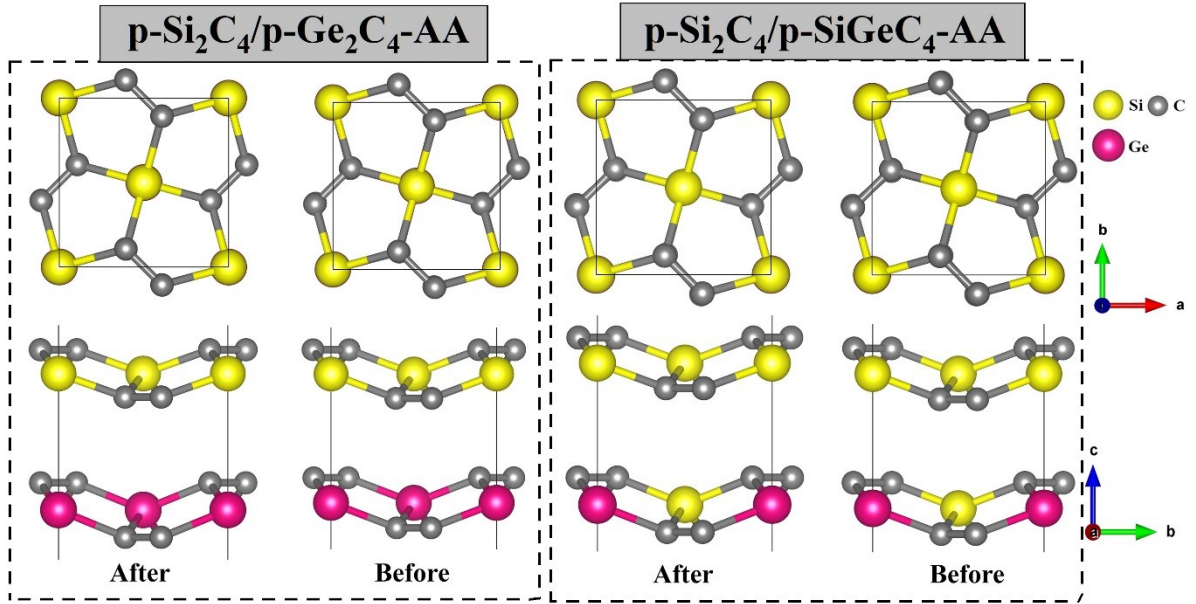

**Fig. S2.** Top and side views of (left)  $p\text{-Si}_2\text{C}_4/p\text{-Ge}_2\text{C}_4$ , (right)  $p\text{-Si}_2\text{C}_4/p\text{-SiGeC}_4$  *vdWHs* with AA stacking mode after and before structural optimization.

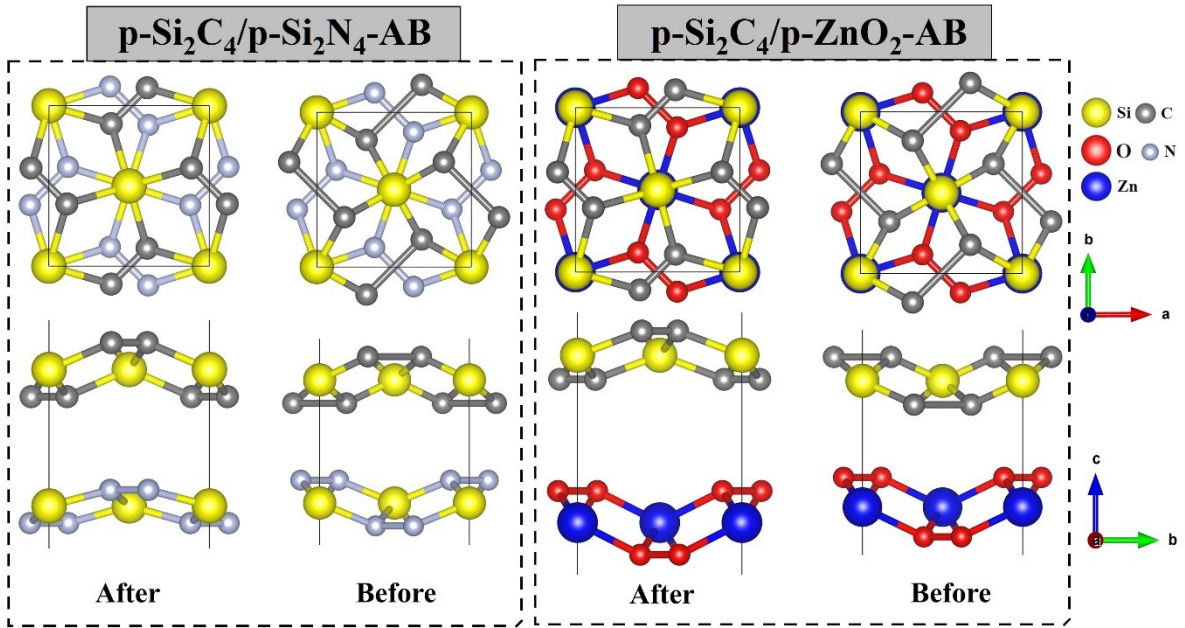

**Fig. S3.** Top and side views of (left)  $p\text{-Si}_2\text{C}_4/p\text{-Si}_2\text{N}_4$ , (right)  $p\text{-Si}_2\text{C}_4/p\text{-ZnO}_2$  *vdWHs* with AB stacking mode after and before structural optimization.

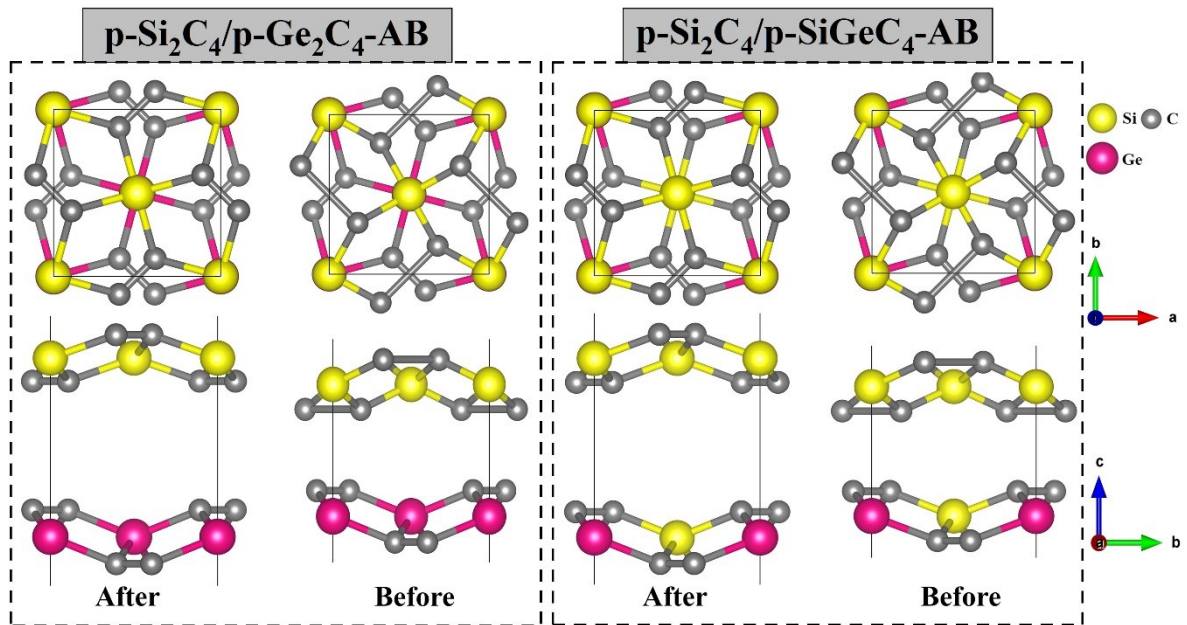

**Fig. S4.** Top and side views of (left)  $p\text{-Si}_2\text{C}_4/p\text{-Ge}_2\text{C}_4$ , (right)  $p\text{-Si}_2\text{C}_4/p\text{-SiGeC}_4$  vdWHs with AB stacking mode after and before structural optimization.
